# Supplementary material
Source: publisher figshare collection journal article supplement (https://tandf.figshare.com/ndownloader/files/17301431)
Supplement: Supplementary file 1 [file 17301431]

Supplement Materials

| Positive vignettes. Correlation between variables | | | |  |  |  |  |  |
| --- | --- | --- | --- | --- | --- | --- | --- | --- |
|  |  | Moral character | | | | Emotions | | |
|  |  | Unfulfilled unexplained | Unfulfilled explained | Fulfilled |  | Unfulfilled unexplained | Unfulfilled explained | Fulfilled |
| Moral character | Unfulfilled explained | 0.09 |  |  |  |  |  |  |
|  | Fulfilled | .13 | **.33***** |  |  |  |  |  |
| Emotions | Unfulfilled unexplained | .72*** | **.00** | .07 |  |  |  |  |
|  | Unfulfilled explained | .07 | **.79***** | .33*** |  | .01 |  |  |
|  | Fulfilled | .08 | **.34***** | .76*** |  | .015 | .43*** |  |
| Informativeness | Unfulfilled unexplained | .05 | **.01** | -.20* |  | .09 | -.01 | -.15 |
|  | Unfulfilled explained | .06 | **.13** | .04 |  | -.01 | .11 | .05 |
|  | Fulfilled | -.11 | **-.07** | -.05 |  | -.09 | -.02 | -.06 |

| Negative vignettes. Correlation between variables | | | |  |  |  |  |  |
| --- | --- | --- | --- | --- | --- | --- | --- | --- |
|  |  | Moral character | | | | Emotions | | |
|  |  | Unfulfilled unexplained | Unfulfilled explained | Fulfilled |  | Unfulfilled unexplained | Unfulfilled explained | Fulfilled |
| Moral character | Unfulfilled explained | .30*** |  |  |  |  |  |  |
|  | Fulfilled | .07 | **.20*** |  |  |  |  |  |
| Emotions | Unfulfilled unexplained | .82*** | **.33***** | .11 |  |  |  |  |
|  | Unfulfilled explained | .25** | **.67***** | .23** |  | .39*** |  |  |
|  | Fulfilled | .10 | **.25**** | .68*** |  | .21** | .43*** |  |
| Informativeness | Unfulfilled unexplained | .29*** | **.13** | .08 |  | .20** | .04 | .12 |
|  | Unfulfilled explained | .00 | **.33***** | .07 |  | .03 | .27** | .10 |
|  | Fulfilled | .08 | **.16** | .32*** |  | .05 | .17* | .36*** |
